# Supplementary material for: Validation in an Independent Cohort of MiR-122, MiR-1271, and MiR-15b as Urinary Biomarkers for the Potential Early Diagnosis of Clear Cell Renal Cell Carcinoma
Source: MDPI journal article supplement (doi:10.3390/cancers14051112), 2022-02-22
Supplement: s1 [file s1]

Supplementary Material

# Validation in an Independent Cohort of MiR-122, MiR-1271, and MiR-15b as Urinary Biomarkers for the Potential Early Diagnosis of Clear Cell Renal Cell Carcinoma

Giovanni Cochetti <sup>1</sup>, Luigi Cari <sup>2</sup>, Vincenza Maulà <sup>1</sup>, Rosy Cagnani <sup>1</sup>, Alessio Paladini <sup>1</sup>, Michele Del Zingaro <sup>1</sup>, Giuseppe Nocentini <sup>2,\*</sup> and Ettore Mearini <sup>1</sup>

<sup>1</sup> Division of Urology Clinic, Department of Medicine and Surgery, University of Perugia, 06129 Perugia, Italy; giovanni.cochetti@unipg.it (G.C.); vincenza.maula@unipg.it (V.M.); rosy.cagnani@unipg.it (R.C.); alessio.paladini@ospedale.perugia.it (A.P.); michele.delzingaro@unipg.it (M.D.Z.); ettore.mearini@unipg.it (E.M.)

<sup>2</sup> Pharmacology Section, Department of Medicine and Surgery, University of Perugia, 06129 Perugia, Italy; luigi.cari@unipg.it (L.C.)

\* Correspondence: giuseppe.nocentini@unipg.it; Tel.: +39-07-5585-8126

**Table S1.** Ct values of miR-122-5p, miR-1271-5p, miR-15b-5p, Cel-miR-39-3p, miRTC, and miR-16-5p, obtained using the urine of HSs and patients with ccRCC.

|            | Ct Value | miR-122-5p | miR-1271-5p | miR-15b-5p | Cel-miR-39-3p | miRTC | miR-16-5p |
|------------|----------|------------|-------------|------------|---------------|-------|-----------|
| ccRCC      | ccRCC 1  | 40.00      | 38.10       | 32.85      | 28.41         | 32.19 | 39.21     |
|            | ccRCC 2  | 29.24      | 29.42       | 28.05      | 19.97         | 19.11 | 27.20     |
|            | ccRCC 3  | 34.76      | 30.02       | 35.24      | 22.85         | 28.94 | 30.69     |
|            | ccRCC 4  | 39.47      | 33.29       | 31.19      | 23.56         | 28.16 | 31.76     |
|            | ccRCC 5  | 35.30      | 29.53       | 37.15      | 30.10         | 29.32 | 27.04     |
|            | ccRCC 6  | 30.06      | 29.32       | 28.73      | 22.95         | 22.83 | 25.09     |
|            | ccRCC 7  | 36.62      | 31.08       | 40.00      | 23.80         | 23.95 | 31.21     |
|            | ccRCC 8  | 35.54      | 33.21       | 35.18      | 27.49         | 24.93 | 30.79     |
|            | ccRCC 9  | 33.75      | 30.70       | 33.38      | 29.05         | 26.81 | 30.14     |
|            | ccRCC 10 | 37.37      | 29.98       | 40.00      | 32.54         | 32.57 | 30.32     |
|            | ccRCC 11 | 38.63      | 31.31       | 38.45      | 24.82         | 32.45 | 37.21     |
|            | ccRCC 12 | 35.85      | 29.98       | 39.54      | 26.52         | 23.36 | 32.10     |
|            | ccRCC 13 | 40.00      | 32.33       | 39.32      | 23.67         | 26.55 | 30.10     |
|            | ccRCC 14 | 39.20      | 31.94       | 40.00      | 26.60         | 25.95 | 35.12     |
|            | ccRCC 15 | 38.95      | 30.35       | 38.63      | 26.76         | 30.19 | 30.60     |
|            | ccRCC 16 | 38.26      | 34.57       | 38.86      | 29.72         | 33.23 | 30.89     |
|            | ccRCC 17 | 31.14      | 29.58       | 28.03      | 34.16         | 31.09 | 29.30     |
|            | ccRCC 18 | 38.71      | 30.76       | 35.01      | 26.63         | 28.89 | 28.40     |
|            | ccRCC 19 | 25.50      | 24.51       | 28.01      | 23.24         | 24.02 | 23.43     |
|            | ccRCC 20 | 24.69      | 24.93       | 26.95      | 19.62         | 19.32 | 23.00     |
|            | ccRCC 21 | 31.20      | 28.12       | 25.59      | 21.51         | 21.04 | 25.45     |
|            | ccRCC 22 | 36.00      | 30.20       | 25.88      | 18.40         | 21.27 | 26.33     |
|            | ccRCC 23 | 35.31      | 29.28       | 26.12      | 20.90         | 23.80 | 30.24     |
|            | ccRCC 24 | 30.99      | 29.53       | 29.73      | 33.62         | 32.30 | 29.24     |
| Mean ccRCC |          | 34.86      | 30.50       | 33.41      | 25.70         | 26.76 | 29.79     |
| SD ccRCC   |          | 4.43       | 2.77        | 5.31       | 4.38          | 4.42  | 3.87      |
| HSs        | HS 1     | 36.65      | 30.18       | 38.24      | 29.94         | 39.18 | 26.48     |
|            | HS 2     | 31.29      | 29.69       | 25.44      | 27.69         | 31.17 | 25.23     |
|            | HS 3     | 40.00      | 33.38       | 40.00      | 31.82         | 34.89 | 32.63     |
|            | HS 4     | 39.00      | 31.03       | 39.02      | 27.02         | 33.44 | 36.15     |
|            | HS 5     | 39.05      | 33.16       | 37.96      | 31.51         | 34.67 | 32.59     |

|          |       |       |       |       |       |       |
|----------|-------|-------|-------|-------|-------|-------|
| HS 6     | 40.00 | 36.37 | 40.00 | 23.18 | 28.40 | 38.06 |
| HS 7     | 38.39 | 30.58 | 34.39 | 29.52 | 36.60 | 30.22 |
| HS 8     | 34.93 | 32.23 | 29.67 | 30.32 | 37.72 | 28.57 |
| HS 9     | 36.28 | 31.54 | 38.56 | 28.91 | 34.20 | 31.07 |
| HS 10    | 35.92 | 31.15 | 38.84 | 25.09 | 26.54 | 29.08 |
| HS 11    | 40.00 | 31.37 | 39.00 | 31.96 | 27.65 | 31.12 |
| HS 12    | 40.00 | 28.87 | 38.36 | 28.26 | 24.23 | 35.32 |
| HS 13    | 35.87 | 29.14 | 27.26 | 17.70 | 23.15 | 26.59 |
| HS 14    | 31.19 | 32.67 | 30.98 | 30.60 | 39.72 | 33.10 |
| HS 15    | 35.60 | 29.25 | 40.00 | 34.52 | 36.85 | 30.59 |
| HS 16    | 37.86 | 30.40 | 35.31 | 31.30 | 37.11 | 31.92 |
| HS 17    | 40.00 | 30.30 | 39.21 | 34.95 | 34.45 | 31.34 |
| HS 18    | 34.55 | 33.38 | 38.32 | 20.77 | 32.07 | 28.54 |
| HS 19    | 40.00 | 32.39 | 40.00 | 24.49 | 32.61 | 31.44 |
| HS 20    | 40.00 | 31.66 | 26.74 | 32.35 | 31.28 | 28.17 |
| HS 21    | 40.00 | 30.41 | 38.05 | 33.70 | 40.00 | 32.11 |
| HS 22    | 33.80 | 34.35 | 40.00 | 24.37 | 27.65 | 39.51 |
| HS 23    | 40.00 | 35.25 | 40.00 | 26.64 | 28.50 | 36.07 |
| Mean HSs | 37.41 | 31.68 | 36.32 | 28.55 | 32.70 | 31.56 |
| SD HSs   | 2.86  | 1.97  | 4.78  | 4.40  | 4.90  | 3.66  |

**Table S2.** Ct and  $\Delta$ Ct of the seven parameters #1, #2, #3, #4, #5, #6, and #7.  $\Delta$ Ct (parameters #2, #3, #4, #5, #6, and #7) were calculated using data reported in Table S1.

| Parameter             | # 1         | # 2                  | # 3              | # 4                   | # 5               | # 6              | # 7                      |
|-----------------------|-------------|----------------------|------------------|-----------------------|-------------------|------------------|--------------------------|
| Parameter Description | miR-1271-5p | miR-122-5p/miR-16-5p | miR-122-5p/miRTC | miR-1271-5p/miR-16-5p | miR-1271-5p/miRTC | miR-15b-5p/miRTC | miR-15b-5p/Cel-miR-39-3p |
|                       | Ct          | $\Delta$ Ct          | $\Delta$ Ct      | $\Delta$ Ct           | $\Delta$ Ct       | $\Delta$ Ct      | $\Delta$ Ct              |
| ccRCC                 | ccRCC 1     | 38.10                | 0.79             | 7.81                  | - 1.11            | 5.91             | 4.44                     |
|                       | ccRCC 2     | 29.42                | 2.04             | 10.13                 | 2.22              | 10.31            | 8.08                     |
|                       | ccRCC 3     | 30.02                | 4.07             | 5.82                  | -0.67             | 1.08             | 12.39                    |
|                       | ccRCC 4     | 33.29                | 7.71             | 11.31                 | 1.53              | 5.13             | 7.63                     |
|                       | ccRCC 5     | 29.53                | 8.27             | 5.98                  | 2.49              | 0.21             | 7.05                     |
|                       | ccRCC 6     | 29.32                | 4.97             | 7.23                  | 4.23              | 6.49             | 5.78                     |
|                       | ccRCC 7     | 31.08                | 5.41             | 12.67                 | -0.13             | 7.13             | 16.20                    |
|                       | ccRCC 8     | 33.21                | 4.75             | 10.61                 | 2.42              | 8.28             | 7.69                     |
|                       | ccRCC 9     | 30.70                | 3.61             | 6.94                  | 0.56              | 3.89             | 4.33                     |
|                       | ccRCC 10    | 29.98                | 7.05             | 4.80                  | -0.34             | -2.59            | 7.46                     |
|                       | ccRCC 11    | 31.31                | 1.42             | 6.18                  | -5.90             | -1.14            | 13.63                    |
|                       | ccRCC 12    | 29.98                | 3.75             | 12.49                 | -2.12             | 6.62             | 13.02                    |
|                       | ccRCC 13    | 32.33                | 9.90             | 13.45                 | 2.23              | 5.78             | 15.65                    |
|                       | ccRCC 14    | 31.94                | 4.08             | 13.25                 | -3.18             | 5.99             | 13.40                    |
|                       | ccRCC 15    | 30.35                | 8.35             | 8.76                  | -0.25             | 0.16             | 11.87                    |
|                       | ccRCC 16    | 34.57                | 7.37             | 5.03                  | 3.68              | 1.34             | 9.14                     |
|                       | ccRCC 17    | 29.58                | 1.84             | 0.05                  | 0.28              | -1.51            | -6.13                    |
|                       | ccRCC 18    | 30.76                | 10.31            | 9.82                  | 2.36              | 1.87             | 8.38                     |
|                       | ccRCC 19    | 24.51                | 2.07             | 1.48                  | 1.08              | 0.49             | 4.77                     |
|                       | ccRCC 20    | 24.93                | 1.69             | 5.37                  | 1.93              | 5.61             | 7.33                     |
|                       | ccRCC 21    | 28.12                | 5.75             | 10.16                 | 2.67              | 7.08             | 4.08                     |
|                       | ccRCC 22    | 30.20                | 9.67             | 14.73                 | 3.87              | 8.93             | 7.48                     |
|                       | ccRCC 23    | 29.28                | 5.07             | 11.51                 | -0.96             | 5.48             | 5.22                     |
|                       | ccRCC 24    | 29.53                | 1.75             | -1.31                 | 0.29              | -2.77            | -3.89                    |
| Mean ccRCC            |             | 30.50                | 5.07             | 8.09                  | 0.72              | 3.74             | 7.71                     |
| SD ccRCC              |             | 2.77                 | 2.94             | 4.27                  | 2.37              | 3.83             | 5.33                     |
| HSs                   | HS 1        | 30.18                | 10.17            | -2.53                 | 3.70              | -9.00            | 8.30                     |
|                       | HS 2        | 29.69                | 6.06             | 0.12                  | 4.46              | -1.48            | -2.25                    |
|                       | HS 3        | 33.38                | 7.37             | 5.11                  | 0.75              | -1.51            | 8.18                     |
|                       | HS 4        | 31.03                | 2.85             | 5.56                  | -5.12             | -2.41            | 12.00                    |

|                                      |                     |        |        |        |        |        |        |        |
|--------------------------------------|---------------------|--------|--------|--------|--------|--------|--------|--------|
|                                      | HS 5                | 33.16  | 6.46   | 4.38   | 0.57   | -1.51  | 3.29   | 6.45   |
|                                      | HS 6                | 36.37  | 1.94   | 11.60  | -1.69  | 7.97   | 11.60  | 16.82  |
|                                      | HS 7                | 30.58  | 8.17   | 1.79   | 0.36   | -6.02  | -2.21  | 4.87   |
|                                      | HS 8                | 32.23  | 6.36   | -2.79  | 3.66   | -5.49  | -8.05  | -0.65  |
|                                      | HS 9                | 31.54  | 5.21   | 2.08   | 0.47   | -2.66  | 4.36   | 9.65   |
|                                      | HS 10               | 31.15  | 6.84   | 9.38   | 2.07   | 4.61   | 12.30  | 13.75  |
|                                      | HS 11               | 31.37  | 8.88   | 12.35  | 0.25   | 3.72   | 11.35  | 7.04   |
|                                      | HS 12               | 28.87  | 4.68   | 15.77  | -6.45  | 4.64   | 14.13  | 10.10  |
|                                      | HS 13               | 29.14  | 9.28   | 12.72  | 2.55   | 5.99   | 4.11   | 9.56   |
|                                      | HS 14               | 32.67  | -1.91  | -8.53  | -0.43  | -7.05  | -8.74  | 0.38   |
|                                      | HS 15               | 29.25  | 5.01   | -1.25  | -1.34  | -7.60  | 3.15   | 5.48   |
|                                      | HS 16               | 30.40  | 5.94   | 0.75   | -1.52  | -6.71  | -1.80  | 4.01   |
|                                      | HS 17               | 30.30  | 8.66   | 5.55   | -1.04  | -4.15  | 4.76   | 4.26   |
|                                      | HS 18               | 33.38  | 6.01   | 2.48   | 4.84   | 1.31   | 6.25   | 17.55  |
|                                      | HS 19               | 32.39  | 8.56   | 7.39   | 0.95   | -0.22  | 7.39   | 15.51  |
|                                      | HS 20               | 31.66  | 11.83  | 8.72   | 3.50   | 0.38   | -4.54  | -5.61  |
|                                      | HS 21               | 30.41  | 7.89   | 0      | -1.70  | -9.59  | -1.95  | 4.35   |
|                                      | HS 22               | 34.35  | -5.71  | 6.15   | -5.16  | 6.70   | 12.35  | 15.63  |
|                                      | HS 23               | 35.25  | 3.93   | 11.50  | -0.82  | 6.75   | 11.50  | 13.36  |
|                                      | Mean HSs            | 31.68  | 5.85   | 4.71   | 0.12   | -1.01  | 3.62   | 7.77   |
|                                      | SD HSs              | 1.97   | 3.86   | 5.98   | 3.03   | 5.45   | 6.86   | 6.24   |
|                                      | Mean ccRCC/Mean HSs | 1.18   | 0.78   | -3.39  | -0.59  | -4.75  | -3.03  | 0.06   |
|                                      | Passed KS test      | No     | Yes    | Yes    | Yes    | No     | Yes    | Yes    |
|                                      | <i>p</i> value      | 0.0645 | 0.4408 | 0.0300 | 0.4578 | 0.0025 | 0.0881 | 0.9704 |
| values shown<br>by ccRCC<br>patients | Range-SD            | 27.73  | 2.13   | 3.82   | -1.65  | -0.09  | 1.71   | 2.38   |
|                                      | Range + SD          | 33.27  | 8.01   | 12.37  | 3.08   | 7.57   | 11.59  | 13.04  |

**Table S3.** Derivative of Ct and  $\Delta$ Ct values of the seven parameters obtained as described in the Materials and Methods section and their sum. In bold the values which are below the disease cut-off (-14.76).

|   | Parameter | # 1 <sup>1</sup> | # 2 <sup>1</sup> | # 3 <sup>2</sup> | # 4 <sup>2</sup> | # 5 <sup>2</sup> | # 6 <sup>2</sup> | # 7 <sup>1</sup> | Sum of parameters | Diseased cut-off value |
|---|-----------|------------------|------------------|------------------|------------------|------------------|------------------|------------------|-------------------|------------------------|
|   | ccRCC 3   | -3.25            | -3.94            | -2.00            | -0.98            | -1.17            | -4.59            | -0.65            | <b>-16.57</b>     |                        |
|   | ccRCC 4   | 0.02             | -0.30            | -7.49            | -3.18            | -5.22            | -1.32            | -5.41            | <b>22.89</b>      |                        |
|   | ccRCC 5   | -3.74            | 0.26             | -2.16            | -4.41            | -0.30            | -6.12            | -5.98            | <b>-22.19</b>     |                        |
|   | ccRCC 6   | -3.95            | -3.04            | -3.41            | -5.88            | -6.58            | -4.19            | -7.26            | <b>-34.30</b>     |                        |
|   | ccRCC 7   | -2.19            | -2.60            | -8.85            | -1.52            | -7.22            | -14.34           | 3.16             | <b>-33.55</b>     |                        |
|   | ccRCC 8   | -0.06            | -3.26            | -6.79            | -4.07            | -8.37            | -8.54            | -5.35            | <b>-36.43</b>     |                        |
| S | ccRCC 9   | -2.57            | -4.40            | -3.12            | -2.21            | -3.98            | -4.86            | -8.71            | <b>-29.84</b>     |                        |
| A | ccRCC 10  | -3.29            | -0.96            | -0.98            | -1.31            | 2.50             | -5.72            | -5.58            | <b>-15.33</b>     |                        |
| M | ccRCC 11  | -1.96            | -6.59            | -2.36            | 4.25             | 1.05             | -4.29            | 0.59             | -9.30             |                        |
| P | ccRCC 12  | -3.29            | -4.26            | -8.67            | 0.47             | -6.71            | -14.47           | -0.02            | <b>-36.94</b>     |                        |
| L | ccRCC 13  | -0.94            | 1.89             | -9.63            | -3.88            | -5.87            | -11.06           | 2.61             | <b>-26.87</b>     |                        |
| E | ccRCC 14  | -1.33            | -3.92            | -9.43            | 1.53             | -6.08            | -12.34           | 0.36             | <b>-31.21</b>     | <b>-14.76</b>          |
|   | ccRCC 15  | -2.92            | 0.34             | -4.94            | -1.40            | -0.25            | -6.73            | -1.17            | <b>-17.06</b>     |                        |
| C | ccRCC 16  | 1.30             | -0.64            | -1.21            | -5.33            | -1.43            | -3.92            | -3.90            | <b>-15.12</b>     |                        |
| O | ccRCC 17  | -3.69            | -6.17            | 3.77             | -1.93            | 1.42             | 4.77             | -19.17           | <b>-20.99</b>     |                        |
| D | ccRCC 18  | -2.51            | 2.30             | -6.00            | -4.01            | -1.96            | -4.41            | -4.66            | <b>-21.24</b>     |                        |
| E | ccRCC 19  | -8.76            | -5.94            | 2.34             | -2.73            | -0.58            | -2.28            | -8.27            | <b>-26.21</b>     |                        |
|   | ccRCC 20  | -8.34            | -6.32            | -1.55            | -3.58            | -5.70            | -5.92            | -5.71            | <b>-37.11</b>     |                        |
|   | ccRCC 21  | -5.15            | -2.26            | -6.34            | -4.32            | -7.17            | -2.84            | -8.96            | <b>-37.03</b>     |                        |
|   | ccRCC 22  | -3.07            | 1.66             | -10.91           | -5.52            | -9.02            | -2.90            | -5.56            | <b>-35.31</b>     |                        |
|   | ccRCC 23  | -3.99            | -2.94            | -7.69            | -0.69            | -5.57            | -0.61            | -7.82            | <b>-29.30</b>     |                        |
|   | ccRCC 24  | -3.74            | -6.26            | 5.13             | -1.94            | 2.68             | 4.28             | -16.93           | <b>-16.77</b>     |                        |
|   | HS 1      | -3.09            | 2.16             | 6.35             | -5.35            | 8.90             | 2.64             | -4.73            | 6.89              |                        |

|       |       |        |        |       |       |        |        |               |
|-------|-------|--------|--------|-------|-------|--------|--------|---------------|
| HS 2  | -3.58 | -1.95  | 3.70   | -6.11 | 1.39  | 7.44   | -15.29 | -14.39        |
| HS 3  | 0.11  | -0.64  | -1.29  | -2.40 | 1.42  | -3.40  | -4.86  | -11.05        |
| HS 4  | -2.24 | -5.16  | -1.74  | 3.47  | 2.32  | -3.87  | -1.04  | -8.25         |
| HS 5  | -0.11 | -1.55  | -0.56  | -2.22 | 1.42  | -1.58  | -6.59  | -11.18        |
| HS 6  | 3.10  | -6.07  | -7.78  | 0.04  | -8.06 | -9.89  | 3.78   | <b>-24.87</b> |
| HS 7  | -2.69 | 0.16   | 2.04   | -2.01 | 5.93  | 3.92   | -8.17  | -0.82         |
| HS 8  | -1.04 | -1.65  | 6.61   | -5.31 | 5.40  | 9.76   | -13.69 | 0.09          |
| HS 9  | -1.73 | -2.80  | 1.74   | -2.12 | 2.57  | -2.65  | -3.39  | -8.37         |
| HS 10 | -2.12 | -1.17  | -5.56  | -3.72 | -4.70 | -10.59 | 0.71   | <b>-27.14</b> |
| HS 11 | -1.90 | 0.87   | -8.53  | -1.90 | -3.81 | -9.64  | -6.00  | <b>-30.90</b> |
| HS 12 | -4.40 | -3.32  | -11.95 | 4.80  | -4.73 | -12.42 | -2.94  | <b>-34.96</b> |
| HS 13 | -4.13 | 1.27   | -8.90  | -4.20 | -6.08 | -2.40  | -3.48  | <b>-27.91</b> |
| HS 14 | -0.60 | -9.92  | 12.35  | -1.22 | 6.96  | 10.45  | -12.66 | 5.37          |
| HS 15 | -4.02 | -3.00  | 5.07   | -0.31 | 7.51  | -1.44  | -7.56  | -3.74         |
| HS 16 | -2.87 | -2.07  | 3.07   | -0.13 | 6.62  | 3.51   | -9.03  | -0.89         |
| HS 17 | -2.97 | 0.65   | -1.73  | -0.61 | 4.06  | -3.05  | -8.78  | -12.42        |
| HS 18 | 0.11  | -2.00  | 1.34   | -6.49 | -1.40 | -4.54  | 4.51   | -8.46         |
| HS 19 | -0.88 | 0.55   | -3.57  | -2.60 | 0.13  | -5.68  | 2.47   | -9.57         |
| HS 20 | -1.61 | 3.82   | -4.90  | -5.15 | -0.47 | 6.25   | -18.65 | <b>-20.70</b> |
| HS 21 | -2.86 | -0.12  | 3.82   | 0.05  | 9.50  | 3.66   | -8.69  | 5.37          |
| HS 22 | 1.08  | -13.72 | -2.33  | 3.51  | -6.79 | -10.64 | 2.59   | <b>-26.29</b> |
| HS 23 | 1.98  | -4.08  | -7.68  | -0.83 | -6.84 | -9.79  | 0.32   | <b>-26.91</b> |

<sup>1</sup> Values were calculated with the following formula: subject Ct (or ΔCt) -[mean Ct (or ΔCt) of ccRCC + SD of ccRCC].

<sup>2</sup> Values were calculated with the following formula: [mean Ct (or ΔCt) of ccRCC -SD of ccRCC] -subject Ct (or ΔCt).

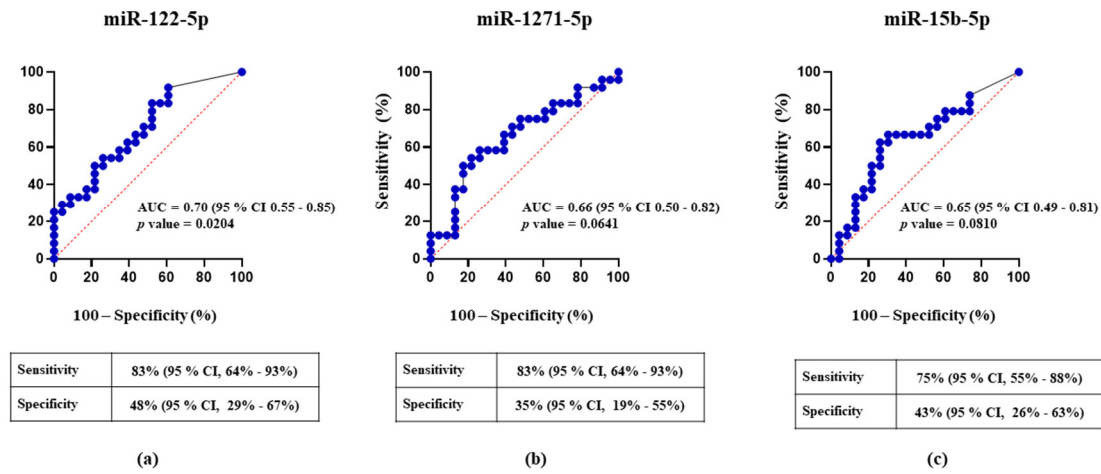

**Figure S1.** ROC curves of miR-122-5p (a), miR-1271-5p (b), and miR-15b-5p (c).

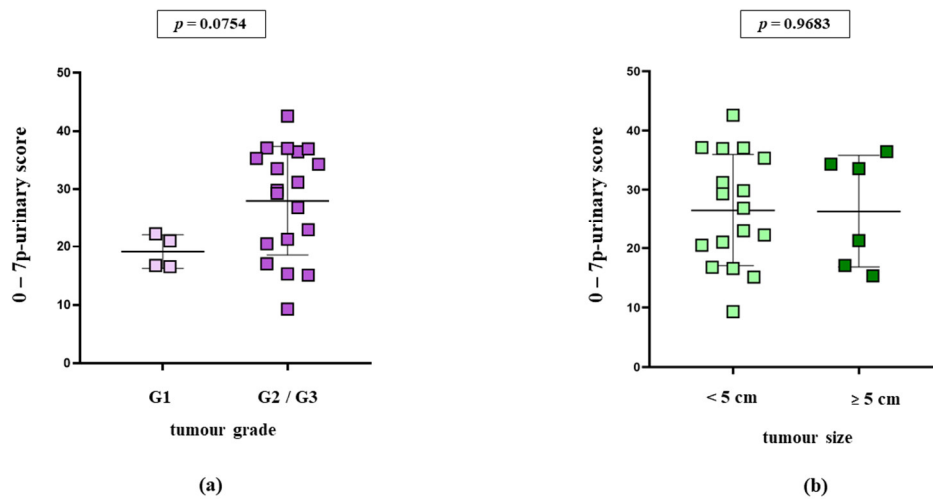

**Figure S2.** Lack of difference of the 7p-urinary scores between ccRCC tumors of different grades and sizes. (a) The 7p-urinary score mean of patients with grade 1 (G1) ccRCC is not significantly different (unpaired t-test) from that of patients with ccRCC with grade 2 and grade 3 (G2 – G3). (b) The 7p-urinary score mean of patients with ccRCC with a size smaller than 5 cm is not significantly different (unpaired t-test) from that of patients with a ccRCC size greater than 5 cm.
